# Supplementary material for: Self-assembled octameric cage constructed by the potassium salt of p-tert-butylcalix[6]arene p-bromophenylalanine derivative in the solid state
Source: Royal Society of Chemistry journal article supplement (doi:10.1039/b605555a), 2006-01-01
Supplement: b605555a.pdf [file b605555a.pdf]

## *Electronic Supplementary Information*

### **Self-assembled octameric cage constructed by potassium salt of *p*-*tert*-butylcalix[6]arene *p*-bromophenylalanine derivative in solid state**

**Koji Tsukamoto, Hirofumi Ohishi,\* Yoichi Hiyama, Naoyoshi Maezaki,\*  
Tetsuaki Tanaka,\* and Toshimasa Ishida**

#### ***Synthesis***

**General:** Melting points are uncorrected. Optical rotations were measured using a JASCO DIP-360 digital polarimeter. IR absorption spectra (FT: diffuse reflectance spectroscopy) were measured with a Horiba FT-210 IR spectrometer using KBr powder.  $^1\text{H}$  NMR spectra were measured with a JEOL JNM-GX500 spectrometer (500 MHz) or a JEOL JNM-AL300 spectrometer (300 MHz).  $^{13}\text{C}$  NMR spectra were measured with a JEOL JNM-AL300 spectrometer (75 MHz) or a JEOL JNM-EX270 spectrometer (67.8 MHz). All signals are expressed as ppm downfield from tetramethylsilane used as an internal standard ( $\delta$  value). The following abbreviations are used: singlet (s), doublet (d), triplet (t), and multiplet (m). Fast atom bombardment (FAB) mass spectra were obtained with JEOL JMS-600H and JEOL JMS-700. Time of flight (TOF) mass spectra were obtained using Applied Biosystems Voyager-DE. Unless stated, all reactions were carried out under  $\text{N}_2$  atmosphere. Merck Kieselgel 60 was used as an adsorbent for column chromatography.

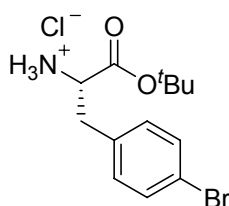

***p*-Bromo-L-phenylalanine *tert*-butyl ester hydrochloride (4).** A sealed tube was charged with *p*-bromo-L-phenylalanine (2.00 g, 8.19 mmol), dioxane (12 mL), conc.  $\text{H}_2\text{SO}_4$  (2 mL) and liq. 2-methylpropene (ca. 8 mL). After sealing, the mixture was stirred at rt overnight. The reaction mixture was poured onto 50 mL of 2 N NaOH, and the mixture was extracted twice with  $\text{Et}_2\text{O}$ . The solvent was evaporated and the residue was neutralized with 4.0 M HCl–dioxane (2.1 mL) at 0 °C prior to solvent evaporation to

give crude **4**. Pure **4** is a colorless needles (1.57 g, 57%) obtained by recrystallization from MeOH/EtOAc (Found: C, 46.30; H, 5.61; N, 4.18; Br+Cl, 33.97. Calc. for C<sub>13</sub>H<sub>19</sub>BrClO<sub>2</sub>: C, 46.38; H, 5.69; N, 4.16; Br+Cl, 34.26%); mp 214–215 °C; [ $\alpha$ ]<sub>D</sub><sup>22</sup> +21.3 (*c* 1.00 in MeOH);  $\nu_{\max}/\text{cm}^{-1}$  3439 (NH), 1728 (C=O), 1568 (NH<sub>3</sub><sup>+</sup>);  $\delta_{\text{H}}$ (500 MHz; CD<sub>3</sub>OD) 1.43 (9H, s, C(CH<sub>3</sub>)<sub>3</sub>), 3.15 (2H, d, *J* 7.3, ArCH<sub>2</sub>), 4.18 (1H, t, *J* 7.3, NCH), 7.22 (2H, d, *J* 8.5, Ar–H), 7.53 (2H, d, *J* 8.5, Ar–H);  $\delta_{\text{C}}$ (75 MHz; CD<sub>3</sub>OD) 28.0 (3C), 37.0, 55.2, 85.4, 122.7, 132.6 (2C), 133.1 (2C), 135.0, 168.9.

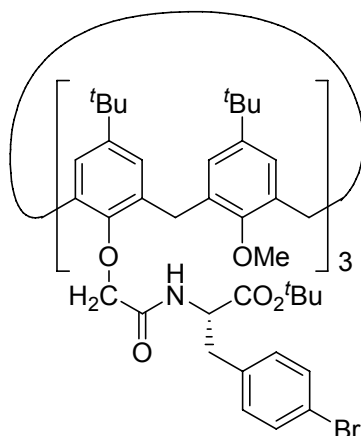

**5,11,17,23,29,35-Hexa-tert-butyl-37,39,41-trimethoxycalix[6]arene-38,40,42-tris-oxyacetyl-N-p-bromo-L-phenylalanine tert-butyl ester (5)**. PyProp·PF<sub>6</sub> (1.74 g, 3.74 mmol) was added to a mixture of calix[6]arene derivative **3** (1.49 g, 1.25 mmol), diisopropylethylamine (1.99 mL, 11.6 mmol), and amino acid **4** (1.26 g, 3.74 mmol) in DMF (25 mL). The whole was stirred at rt for 20 h. The mixture was diluted with Et<sub>2</sub>O and washed sequentially with 1 N NaOH, water, 10% citric acid, and water. The solution was dried over Na<sub>2</sub>SO<sub>4</sub>, and the solvent was evaporated. The crude residue was chromatographed on silica gel eluting with hexane–CHCl<sub>3</sub>–EtOAc (3:1:1) to give **5** (2.00 g, 78%) as a colorless powder (Found: C, 67.36; H, 7.22; N, 2.00; Br, 11.42. Calc. for C<sub>114</sub>H<sub>144</sub>Br<sub>3</sub>N<sub>3</sub>O<sub>15</sub>: C, 67.25; H, 7.13; N, 2.06; Br, 11.77%); mp 114–116 °C; [ $\alpha$ ]<sub>D</sub><sup>23</sup> +10.0 (*c* 1.00 in CHCl<sub>3</sub>);  $\nu_{\max}/\text{cm}^{-1}$  3421 (NH), 1740 (CO<sub>2</sub>R), 1686 (CONH);  $\delta_{\text{H}}$ (500 MHz; CDCl<sub>3</sub>) 0.78 (27H, s, C(CH<sub>3</sub>)<sub>3</sub>), 1.40 (27H, s, C(CH<sub>3</sub>)<sub>3</sub>), 1.42 (27H, s, C(CH<sub>3</sub>)<sub>3</sub>), 2.30 (9H, s, OCH<sub>3</sub>), 3.04 (3H, dd, *J* 7.9 and 14.0, ArCH<sub>2</sub>CHN), 3.18 (3H, dd, *J* 6.1 and 14.0, ArCH<sub>2</sub>CHN), 3.26 (3H, d, *J* 15.3, ArCH<sub>2</sub>Ar), 3.45 (3H, d, *J* 15.3, ArCH<sub>2</sub>Ar), 4.26 (3H, d, *J* 15.3, ArCH<sub>2</sub>Ar), 4.29 (3H, d, *J* 14.6, OCH<sub>2</sub>CO), 4.43 (3H, d, *J* 15.3, ArCH<sub>2</sub>Ar), 4.56 (3H, d, *J* 14.6, OCH<sub>2</sub>CO), 4.88 (3H, ddd, *J* 6.1, 7.9 and 8.5, NCH), 6.59 (3H, s, Ar–H), 6.63 (3H, s, Ar–H), 7.04 (6H, d, *J* 8.5, Ar–H), 7.17 (6H, d, *J* 8.5, Ar–H), 7.27 (6H, m, Ar–H), 7.51 (3H, d, *J* 8.5, NH);  $\delta_{\text{C}}$ (75 MHz, CDCl<sub>3</sub>) 27.9 (9C), 29.7 (3C), 30.1

(3C), 31.0 (9C), 31.6 (9C), 33.9 (3C), 34.2 (3C), 37.5 (3C), 53.0 (3C), 60.1 (3C), 71.2 (3C), 82.2 (3C), 120.7 (3C), 123.6 (3C), 124.1 (3C), 127.9 (3C), 128.5 (3C), 131.0 (6C), 131.4 (6C), 132.0 (3C), 133.0 (6C), 133.2 (3C), 135.2 (3C), 146.2 (3C), 146.7 (3C), 150.4 (3C), 154.4 (3C), 168.3 (3C), 169.7 (3C).

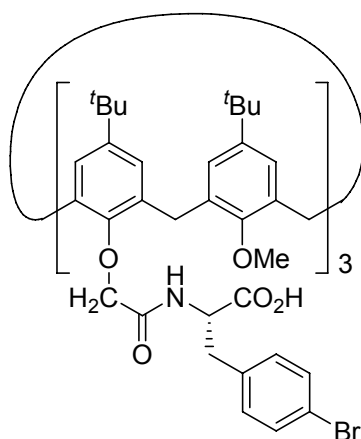

**5,11,17,23,29,35-Hexa-*tert*-butyl-37,39,41-trimethoxycalix[6]arene-38,40,42-tris-oxyacetyl-*N*-*p*-bromo-*L*-phenylalanine (2).** A solution of **5** (30 mg, 14.7  $\mu$ mol) in CF<sub>3</sub>CO<sub>2</sub>H (0.45 mL) was stirred at rt for 8 h. After the solvent was evaporated, the residue was chromatographed on silica gel eluting with CHCl<sub>3</sub>–MeOH–AcOH (97:3:3) to give **1** (25.3 mg, 92%) as a colorless powder (Found: C, 64.50; H, 6.47; N, 2.16; Br, 12.34. Calc. for C<sub>102</sub>H<sub>120</sub>Br<sub>3</sub>N<sub>3</sub>O<sub>15</sub>·2H<sub>2</sub>O: C, 64.35; H, 6.57; N, 2.21; Br, 12.59%); mp 148–150 °C;  $[\alpha]_D^{23} +9.0$  (*c* 1.00 in CHCl<sub>3</sub>);  $\nu_{\max}/\text{cm}^{-1}$  3500–3000 (OH), 3402 (NH), 1738 (CO<sub>2</sub>H), 1678 (CONH);  $\delta_{\text{H}}$ (300 MHz; CDCl<sub>3</sub>) 0.77 (27H, s, C(CH<sub>3</sub>)<sub>3</sub>), 1.40 (27H, s, C(CH<sub>3</sub>)<sub>3</sub>), 2.17 (9H, s, OCH<sub>3</sub>), 3.17 (3H, d, *J* 14.7, ArCH<sub>2</sub>Ar), 3.12–3.20 (3H, m, ArCH<sub>2</sub>CHN), 3.30–3.37 (3H, m, ArCH<sub>2</sub>CHN), 3.39 (3H, d, *J* 15.0, ArCH<sub>2</sub>Ar), 4.24 (3H, d, *J* 14.7, ArCH<sub>2</sub>Ar), 4.35 (3H, d, *J* 15.0, ArCH<sub>2</sub>Ar), 4.39 (3H, d, *J* 14.8, OCH<sub>2</sub>CO), 4.52 (3H, d, *J* 14.8, OCH<sub>2</sub>CO), 5.03 (3H, m, NCH), 6.53 (3H, br s, CO<sub>2</sub>H), 6.66 (6H, s, Ar–H), 7.03 (6H, d, *J* 8.3, Ar–H), 7.17 (6H, d, *J* 8.3, Ar–H), 7.26 (6H, s, Ar–H), 7.98 (3H, d, *J* 7.3, NH);  $\delta_{\text{C}}$ (67.8 MHz; CDCl<sub>3</sub>) 29.5 (3C), 29.8 (3C), 31.0 (9C), 31.7 (9C), 34.1 (3C), 34.4 (3C), 36.7 (3C), 52.9 (3C), 59.8 (3C), 70.9 (3C), 121.0 (3C), 123.7 (3C), 124.0 (3C), 127.8 (3C), 128.5 (3C), 131.0 (6C), 131.4 (6C), 132.0 (3C), 132.6 (3C), 133.2 (3C), 133.5 (3C), 134.5 (3C), 146.0 (3C), 146.8 (3C), 149.6 (3C), 154.0 (3C), 169.3 (3C), 174.5 (3C); TOF-MS: *m/z* = 1868.75 ([M+H]<sup>+</sup> requires 1868.78), 1890.85 ([M+Na]<sup>+</sup> requires 1890.76), 1904.36 ([M+H+2H<sub>2</sub>O]<sup>+</sup> requires 1904.81), 1926.11 ([M+Na+2H<sub>2</sub>O]<sup>+</sup> requires 1926.79).

***X-ray diffraction statistics***

**Table S1.** X-ray diffraction statistics for **1a**. Values in parentheses are for the highest-resolution shell.

|                        | Remote<br>(high energy) | Peak                      | Inflection                | Remote<br>(low energy)    |
|------------------------|-------------------------|---------------------------|---------------------------|---------------------------|
| space group            | <i>R</i> 3              |                           |                           |                           |
| crystal system         | rhombohedral            |                           |                           |                           |
| X-ray wavelength (Å)   | 0.7000                  | 0.9194                    | 0.9200                    | 0.9230                    |
| <i>a</i> (Å)           | 43.05                   | 43.06                     | 43.07                     | 43.08                     |
| <i>b</i> (Å)           | 43.05                   | 43.06                     | 43.07                     | 43.08                     |
| <i>c</i> (Å)           | 43.17                   | 44.17                     | 44.17                     | 44.17                     |
| $\alpha$ (°)           | 90                      |                           |                           |                           |
| $\beta$ (°)            | 90                      |                           |                           |                           |
| $\gamma$ (°)           | 120                     |                           |                           |                           |
| Resolution (Å)         | 50–1.16<br>(1.20–1.16)  | 28.49–1.50<br>(1.58–1.50) | 28.50–1.50<br>(1.58–1.50) | 28.50–1.50<br>(1.58–1.50) |
| All reflections        | 60089                   | 24665                     | 24706                     | 24212                     |
| Unique reflections     | 10543                   | 4757                      | 4769                      | 4763                      |
| $R_{\text{merge}}$ (%) | 6.4 (14.4)              | 6.8 (7.6)                 | 8.7 (7.0)                 | 7.5 (5.5)                 |
| Completeness (%)       | 99.9 (100.0)            | 97.2 (85.3)               | 97.5 (85.0)               | 97.1 (83.1)               |
| mean $I/\sigma I$      | 23.1                    | 20.1                      | 18.4                      | 24.6                      |

**Table S2.** X-ray diffraction statistics for **1b**. Values in parentheses are for the highest-resolution shell.

|                        | Remote<br>(high energy) | Peak                   | Inflection             | Remote<br>(low energy) |
|------------------------|-------------------------|------------------------|------------------------|------------------------|
| space group            | <i>R</i> 3              |                        |                        |                        |
| crystal system         | rhombohedral            |                        |                        |                        |
| X-ray wavelength (Å)   | 0.9100                  | 0.9194                 | 0.9198                 | 0.9220                 |
| <i>a</i> (Å)           | 43.22                   | 43.21                  | 43.21                  | 43.22                  |
| <i>b</i> (Å)           | 43.22                   | 43.21                  | 43.21                  | 43.22                  |
| <i>c</i> (Å)           | 43.40                   | 43.40                  | 43.40                  | 43.40                  |
| $\alpha$ (°)           | 90                      |                        |                        |                        |
| $\beta$ (°)            | 90                      |                        |                        |                        |
| $\gamma$ (°)           | 120                     |                        |                        |                        |
| Resolution (Å)         | 50–1.05<br>(1.09–1.05)  | 50–1.05<br>(1.09–1.05) | 50–1.05<br>(1.09–1.05) | 50–0.95<br>(0.98–0.95) |
| All reflections        | 75273                   | 74966                  | 74947                  | 97012                  |
| Unique reflections     | 14081                   | 14071                  | 14027                  | 18434                  |
| $R_{\text{merge}}$ (%) | 8.6 (67.3)              | 9.7 (65.4)             | 6.6 (38.7)             | 3.8 (39.1)             |
| Completeness (%)       | 99.8 (100.0)            | 99.7 (100.0)           | 99.5 (100.0)           | 96.6 (72.7)            |
| mean $I/\sigma I$      | 19.3                    | 19.2                   | 24.1                   | 29.2                   |

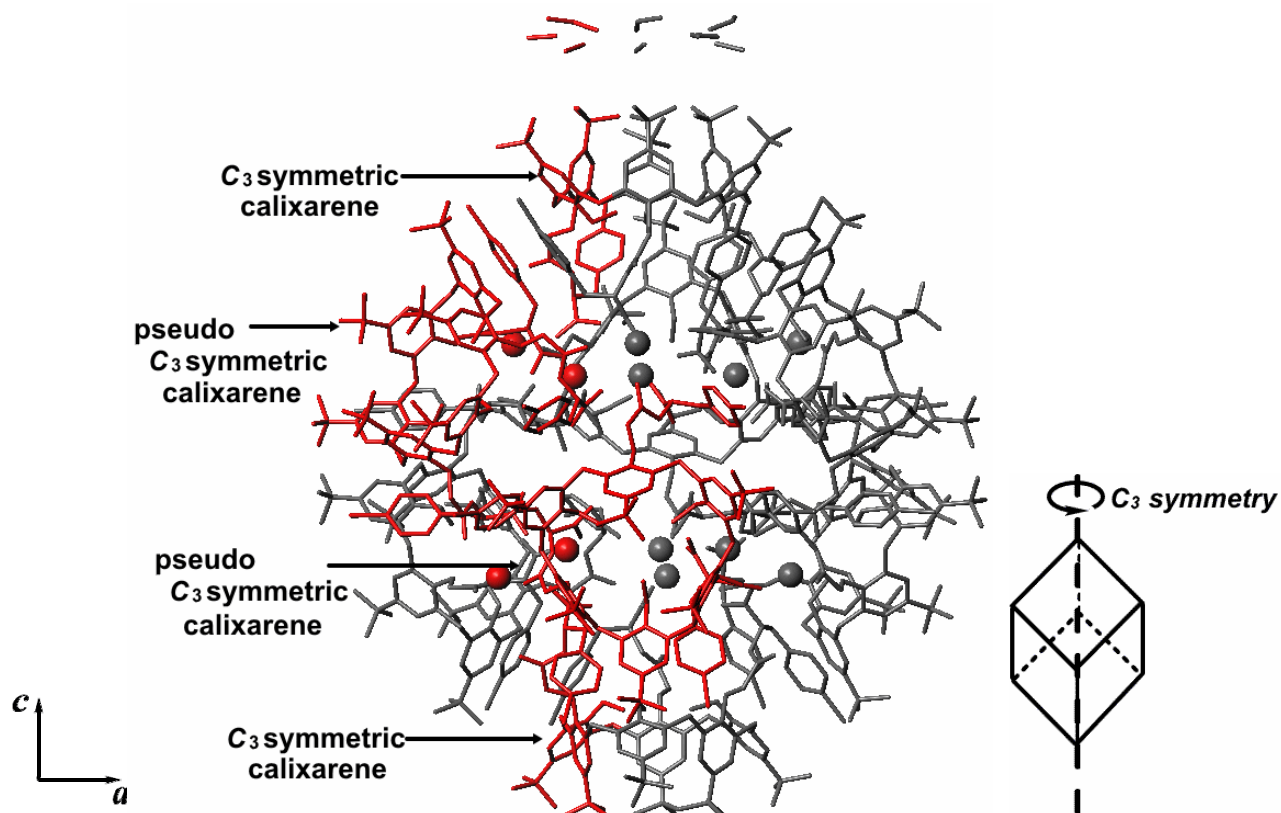

**Fig. S1** View of the octamer of **1a** in parallel with an *ac* plate. Red models show the molecules in an asymmetric unit. The sketch of the cubic octamer and 3-fold axis are drawn at bottom right of the figure. Only the red models at the top and bottom correspond to one-third of the calixarene molecule, respectively. Two calixarene derivatives located at the middle of the red models have pseudo C<sub>3</sub> symmetry. The gray moieties are obtained by the symmetry operation of the red models.
